# Supplementary material for: Formation mechanism of spinel LiTi2O4 prepared by carbon thermal reduction reaction
Source: Royal Society of Chemistry journal article supplement (doi:10.1039/c5ra19621c), 2015-01-01
Supplement: c5ra19621c1.pdf [file c5ra19621c1.pdf]

## Formation mechanism of spinel $\text{LiTi}_2\text{O}_4$ prepared by carbon thermal reduction reaction

Guijun Yang <sup>a, b</sup>, Jianwen Yang <sup>a, c, d\*</sup>, Lingzhi Zhang <sup>b\*</sup>

<sup>a</sup> College of Chemistry and Bioengineering, Guilin University of Technology,

Guilin 541004, Guangxi, China

<sup>b</sup> Key Laboratory of Renewable Energy, Guangzhou Institute of Energy

Conversion, Chinese Academy of Sciences, Guangzhou 510640, Guangdong,

China

<sup>c</sup> Guangxi Provincial Key Laboratory of Optoelectronic & Magnetic Materials,

Guiling 541004, Guangxi, China

Corresponding author:

Tel.: +86 773 5896446; fax: +86 773 5896446.

E-mail address: zhnyjw@163.com (Dr. J. W. Yang).

Tel.: +86 20 37246025; fax: +86 20 37246026.

E-mail address: lzzhang@ms.giec.ac.cn (Dr. L. Z. Zhang).

## Experimental

### Materials

$\text{Li}_2\text{CO}_3$  (> 98%), anatase  $\text{TiO}_2$  (> 99%) and acetylene black were purchased from Tianjin Fuchen Chemicals (China). The electrolyte (1 M  $\text{LiPF}_6$  in ethyl carbonate/dimethyl carbonate (EC/DMC, v/v = 1:1, water content < 10 ppm)) was purchased from Guotai-Huarong New Chemical Materials Co. (China).

### Synthesis and characterization of $\text{LiTi}_2\text{O}_4$

The spinel  $\text{LiTi}_2\text{O}_4$  sample was synthesized by a one-step solid-state carbon thermal reduction reaction using  $\text{Li}_2\text{CO}_3$  and  $\text{TiO}_2$  as starting materials and acetylene black as a reducing agent. In a typical process,  $\text{Li}_2\text{CO}_3$  (0.79 g, 5 mmol), anatase  $\text{TiO}_2$  (3.22 g, 20 mmol) and acetylene black (0.06 g) were thoroughly mixed in agate mortar for 30 min. Then the mixture was calcined at 900 °C for 12 h in a tube furnace under nitrogen atmosphere, and subsequently cooled down to room temperature at a rate of 180 °C  $\text{min}^{-1}$ .  $\text{LiTi}_2\text{O}_4$  with pure phase was obtained as a deep-blue powder.

The morphology of all the experimental samples was observed using a scanning electron microscope (SEM) (Hitachi S-4800, Japan).  $^7\text{Li}$  MAS NMR spectrum of  $\text{LiTi}_2\text{O}_4$  was acquired on an AV 400 Bruker spectrometer under magic angle spinning at 5 kHz using 4mm zirconium rotors. *In situ* VT-XRD was carried out on a PANalytical X'Pert Powder diffractometer with Cu  $K\alpha$  radiation ( $\lambda=1.5405\text{\AA}$ ), equipped with an Anton Parr HTK 1200N high temperature attachment. TA-SDTQ600 thermal gravimetric analysis/differential scanning calorimetry system was used to identify the phase transition temperature in  $\text{N}_2$  atmosphere.

### **Measurements of electrochemical performances**

The CR-2025 coin-type cells were assembled to test the electrochemical performance of the pure  $\text{LiTi}_2\text{O}_4$ . The  $\text{LiTi}_2\text{O}_4$  electrode was prepared by mixing with active material, acetylene black and poly vinylidene fluoride (PVDF) at a weight ratio of 80: 10: 10 in a solution of N-methyl pyrrolidone (NMP) to form homogeneous slurry. The slurry was spread on a copper foil and dried at 110 °C for 24 h under vacuum. The CR-2025 coin-type cells were assembled in an Ar-filled glove-box using 1 M  $\text{LiPF}_6$  in ethylene carbonate (EC) and dimethyl carbonate (DMC) (1:1 in volume) solution as electrolyte. Celgard 2400 and lithium was used as separator and counter electrode, respectively. Galvanostatic charge/discharge tests were performed on a LAND CT2001A battery tester (China). Cyclic voltammetry (CV) and electrochemical impedance spectroscopic (EIS) measurements were performed on an IM6e electrochemical workstation (Zahner, Germany). CV was conducted in cells at  $0.2 \text{ mV s}^{-1}$  from 0.8 V to 2.5 V. EIS was measured by applying an alternating voltage of 5 mV over the frequency ranging from  $10^2$  to  $10^5$  Hz.

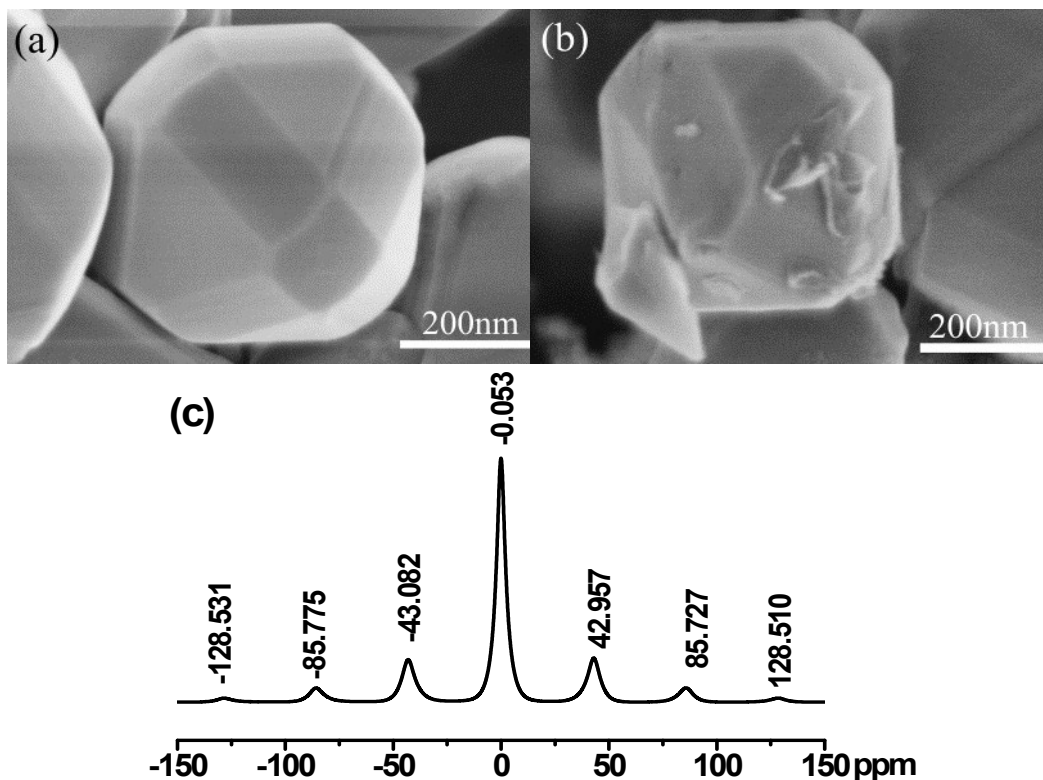

**Figure S1.** SEM images of  $\text{LiTi}_2\text{O}_4$  during (a)  $180^\circ\text{C min}^{-1}$  cooling rate and (b)  $10^\circ\text{C min}^{-1}$  cooling rate and (c)  $^7\text{Li}$  MAS NMR spectra of  $\text{LiTi}_2\text{O}_4$  in  $180^\circ\text{C min}^{-1}$  cooling rate with spinning speeds of 5 kHz.

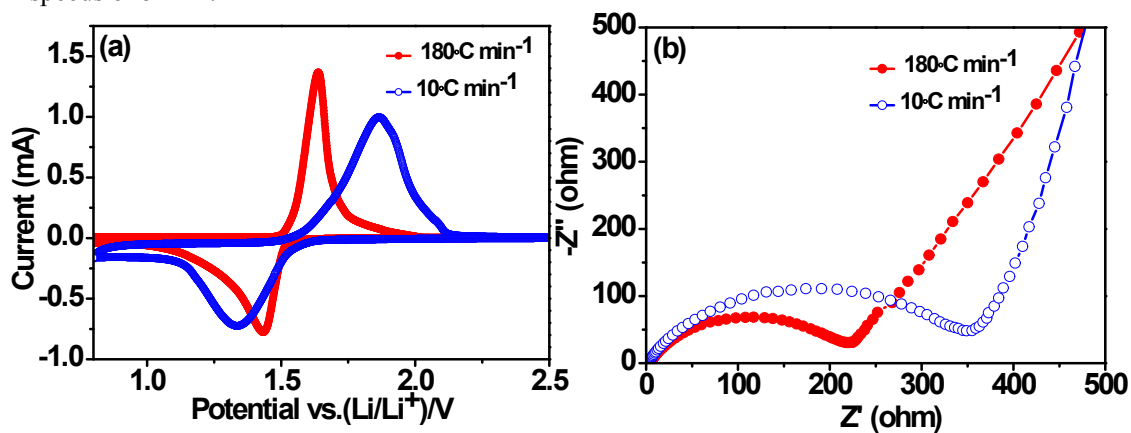

**Figure S2.** CV curves (a) and EIS plots (b) of  $\text{LiTi}_2\text{O}_4$  electrode using the  $\text{LiTi}_2\text{O}_4$  sample prepared at different cooling rate.

**Table S1** Fitted results derived from EIS for  $\text{LiTi}_2\text{O}_4$  at different cooling rates.

| Sample                         | $R_s$ ( $\Omega$ ) | $R_{ct}$ ( $\Omega$ ) | CPE ( $\mu\text{F}$ ) | $i^0$ ( $\text{mA cm}^{-2}$ ) |
|--------------------------------|--------------------|-----------------------|-----------------------|-------------------------------|
| $\text{LiTi}_2\text{O}_4$ -10  | 3.375              | 76.29                 | 24.463                | 0.593                         |
| $\text{LiTi}_2\text{O}_4$ -180 | 2.753              | 43.26                 | 12.249                | 0.337                         |
